# Supplementary material for: Comparison and Characterization of Phenotypic and Genomic Mutations Induced by a Carbon-Ion Beam and Gamma-ray Irradiation in Soybean (Glycine max (L.) Merr.)
Source: Int J Mol Sci. 2023 May 16;24(10):8825. doi: 10.3390/ijms24108825 (PMC10218375; doi:10.3390/ijms24108825)
Supplement: Supplementary file 1 [file ijms-24-08825-s001.zip]

Archive with 5 entries (5 files):
- Figure S1.pdf
- Figure S1.png
- Table S1.xlsx
- Table S2.xlsx
- Table S3.xlsx
