# Supplementary material for: Comparison and Characterization of Phenotypic and Genomic Mutations Induced by a Carbon-Ion Beam and Gamma-ray Irradiation in Soybean (Glycine max (L.) Merr.)
Source: Int J Mol Sci. 2023 May 16;24(10):8825. doi: 10.3390/ijms24108825 (PMC10218375; doi:10.3390/ijms24108825)
Supplement: Supplementary file 1 [file ijms-24-08825-s001.zip › Table S1.xlsx]

## Sheet: Sheet1
TABLE S1 | The seed number of soybean pods in M1 generation (highest dose).
label	mutagen	sterile pods	single-seed pods	two-seed pods	three-seed pods	four-seed pods
CK	none	0	0	8	64	6
CK	none	0	0	9	112	10
CK	none	0	0	10	168	10
CK	none	0	0	8	31	3
CK	none	0	0	8	31	3
CK	none	0	1	16	43	4
CK	none	0	0	8	47	4
CK	none	0	0	13	66	6
180Gy	carbon ion beam	28	58	16	0	0
180Gy	carbon ion beam	37	49	11	0	0
180Gy	carbon ion beam	3	18	7	0	0
180Gy	carbon ion beam	18	7	1	0	0
180Gy	carbon ion beam	10	27	5	0	0
180Gy	carbon ion beam	7	8	2	0	0
180Gy	carbon ion beam	6	8	3	0	0
180Gy	carbon ion beam	12	5	0	0	0
400Gy	gamma ray	12	3	0	0	0
400Gy	gamma ray	4	34	13	1	0
400Gy	gamma ray	0	12	3	0	0
400Gy	gamma ray	8	11	51	8	0
400Gy	gamma ray	22	3	0	0	0
400Gy	gamma ray	4	17	2	1	0
400Gy	gamma ray	0	14	3	0	0
400Gy	gamma ray	38	3	0	0	0
