# Supplementary material for: Comparison and Characterization of Phenotypic and Genomic Mutations Induced by a Carbon-Ion Beam and Gamma-ray Irradiation in Soybean (Glycine max (L.) Merr.)
Source: Int J Mol Sci. 2023 May 16;24(10):8825. doi: 10.3390/ijms24108825 (PMC10218375; doi:10.3390/ijms24108825)
Supplement: Supplementary file 1 [file ijms-24-08825-s001.zip › Table S2.xlsx]

## Sheet: Sheet1
TABLE S2 | Classification of visible mutation phenotype in M2 generation
Pphenotype	description
Leaf Color	The leaf color were changed in a period or whole life of soybean.
Late Maturity	The ripening time was more than 2 weeks later than CK.
Dwarf	The Plant height less than plant height of 95% CK (the average plant height - 1.97*SD).
Precocity	The ripening time was more than 2 weeks earlier than CK.
Height	The Plant height more than plant height of 95% CK (the average plant height + 1.97*SD).
Blade Shape	1) Shrinking of leaf blade 2) Leaf length to width ratio
Plant Type	1) The angle between branch and main stem was changed 2) The maximum peripheral circumference of the whole plant decreases
Seed	1) The color of seed coat was changed 2) The seed size was changed
Sterility	the soybean was not bear seed in finall
Phyllotaxy	The number or arrangement of leaves on the stem were changed
