# Supplementary material for: Comparison and Characterization of Phenotypic and Genomic Mutations Induced by a Carbon-Ion Beam and Gamma-ray Irradiation in Soybean (Glycine max (L.) Merr.)
Source: Int J Mol Sci. 2023 May 16;24(10):8825. doi: 10.3390/ijms24108825 (PMC10218375; doi:10.3390/ijms24108825)
Supplement: Supplementary file 1 [file ijms-24-08825-s001.zip › Table S3.xlsx]

## Sheet: Sheet1
TABLE S3 | The phenotypes and resequencing information of the mutant lines.
sample number	mutagenicity	phenotype	Mapped reads	depth
CIB_1	Carbon Ion Beam	Plant Height	0.9959	34.69X
CIB_2	Carbon Ion Beam	Plant Height	0.9979	35.50X
CIB_3	Carbon Ion Beam	Plant Height	0.9973	34.13X
CIB_4	Carbon Ion Beam	Plant Height	0.9958	39.52X
CIB_5	Carbon Ion Beam	Leaf Yellow	0.9979	35.47X
CIB_6	Carbon Ion Beam	Leaf Yellow	0.9848	35.78X
CIB_7	Carbon Ion Beam	Leaf Yellow	0.9974	39.65X
CIB_8	Carbon Ion Beam	Leaf Yellow	0.9971	36.50X
CIB_9	Carbon Ion Beam	Precocity	0.9848	35.95X
CIB_10	Carbon Ion Beam	Precocity	0.9981	36.90X
CIB_11	Carbon Ion Beam	Precocity	0.9977	37.29X
CIB_12	Carbon Ion Beam	Precocity	0.9688	36.57X
CIB_13	Carbon Ion Beam	Other Phynotype	0.9968	34.73X
CIB_14	Carbon Ion Beam	Other Phynotype	0.9774	40.70X
CIB_15	Carbon Ion Beam	Other Phynotype	0.998	35.31X
CIB_16	Carbon Ion Beam	Other Phynotype	0.9952	36.16X
GR_1	Gamma Ray	Plant Height	0.9967	34.91X
GR_2	Gamma Ray	Plant Height	0.9965	34.59X
GR_3	Gamma Ray	Plant Height	0.9966	35.49X
GR_4	Gamma Ray	Plant Height	0.996	39.90X
GR_5	Gamma Ray	Leaf Yellow	0.9975	36.78X
GR_6	Gamma Ray	Leaf Yellow	0.9963	37.02X
GR_7	Gamma Ray	Leaf Yellow	0.9921	36.16X
GR_8	Gamma Ray	Leaf Yellow	0.9926	35.45X
GR_9	Gamma Ray	Precocity	0.996	35.02X
GR_10	Gamma Ray	Precocity	0.9931	35.41X
GR_11	Gamma Ray	Precocity	0.9976	38.81X
GR_12	Gamma Ray	Precocity	0.9948	34.57X
GR_13	Gamma Ray	Other Phynotype	0.9971	35.01X
GR_14	Gamma Ray	Other Phynotype	0.9958	37.79X
GR_15	Gamma Ray	Other Phynotype	0.996	35.91X
GR_16	Gamma Ray	Other Phynotype	0.9973	36.74X
