# Supplementary figures and images for: Comparison and Characterization of Phenotypic and Genomic Mutations Induced by a Carbon-Ion Beam and Gamma-ray Irradiation in Soybean (Glycine max (L.) Merr.)
Source: MDPI journal article supplement (doi:10.3390/ijms24108825), 2023-05-16

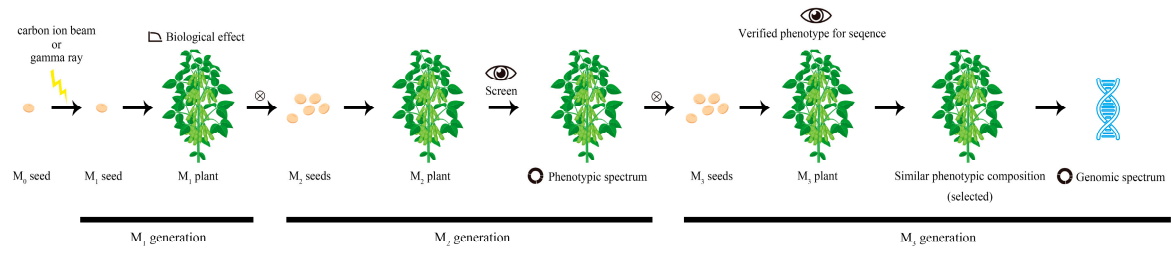

**Figure S1.** The research process of this article.

Supplement: s1 [file s1]
